# Supplementary material
Source: PubMed Central journal article supplement (PMC4160370)
Supplement: NIHMS607468-supplement-01.pdf [file NIHMS607468-supplement-01.pdf]

# Supporting data

**Table S1: Primers and probes sequences**

| Primers and probes      | Sequences             |
|-------------------------|-----------------------|
| PGC-1 $\alpha$ -forward | ACAGCTTTCTGGGTGGATTG  |
| PGC-1 $\alpha$ -reverse | AAATGAGGGCAATCCGTCTT  |
| Cpt-1-forward           | TCCATGCATACCAAAGTGGA  |
| Cpt-1-reverse           | TGGTAGGAGAGCAGCACCTT  |
| CytC-forward            | GGACGTCTGTCTTCGAGTCC  |
| CytC-reverse            | TTGTTCTTGTTGGCATCTGTG |
| Idh3 $\alpha$ -forward  | AATTCCTGGAGATGGAATTGG |
| Idh3 $\alpha$ -reverse  | CATGGACTCCTTGGCTTCTG  |
| SOD-forward             | CAGCATGGGTTCCACGTCCA  |
| SOD-reverse             | CACATTGGCCACACCGTCCT  |
| Gpx-forward             | GGGCAAGGTGCTGCTCATTG  |
| Gpx-reverse             | AGAGCGGGTGAGCCTTCTCA  |
| Catalase-forward        | CCAGCGACCAGATGAAGCAG  |
| Catalase-reverse        | CCACTCTCTCAGGAATCCGC  |

# Figure S1

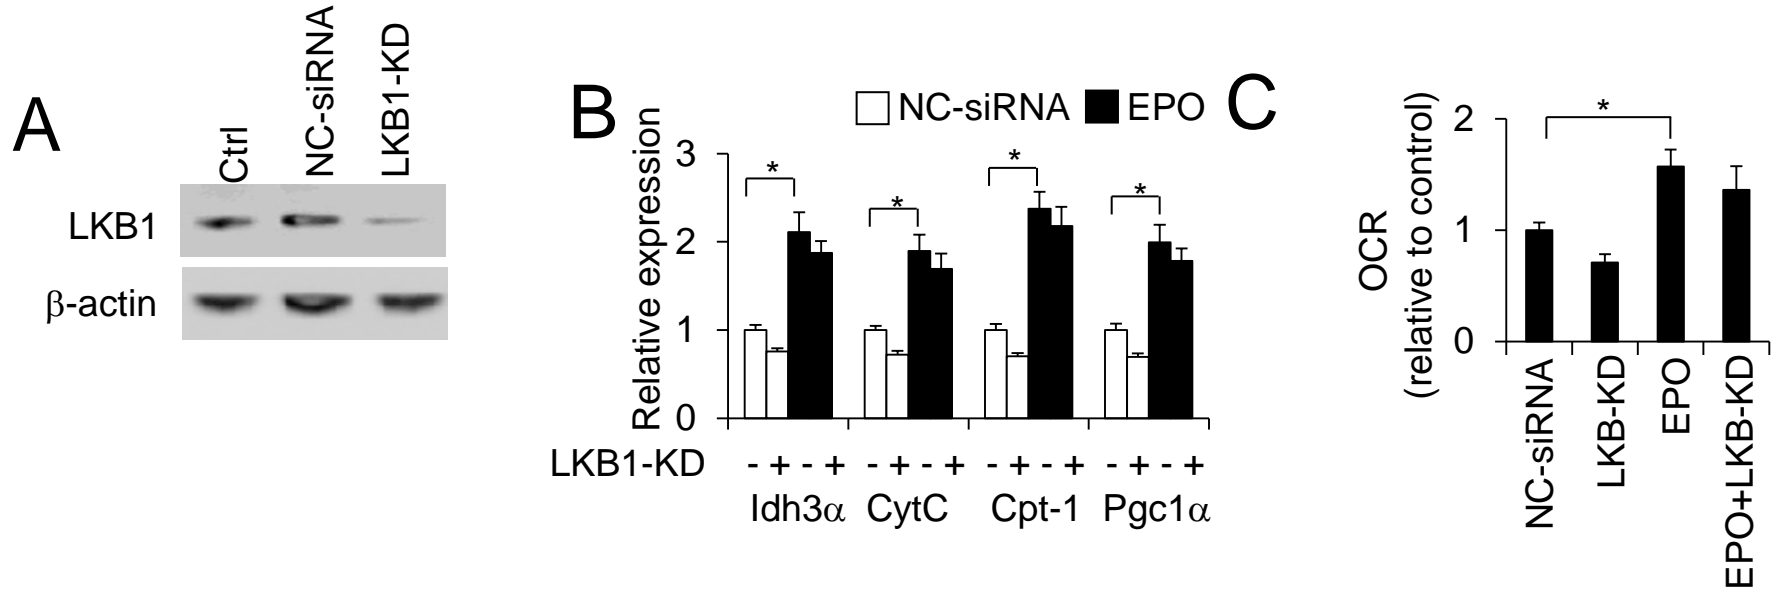

**Figure S1 EPO effects in the adipocytes with LKB1 knock down.** (A) Total LKB1 protein level was determined in 3T3-L1 adipocyte with LKB1 knock down (KD). Ctrl (no siRNA) and negative control siRNA (NC-siRNA) were used as control for LKB1 knock down. (B) The expression of mitochondrial genes was determined in adipocytes without or with knock down of LKB1 without (open bar; control) and with EPO treatment (5U/ml; closed bar). (C) OCR was determined in adipocytes without or with knock down of LKB1 without (open bar; control) and with EPO treatment (5U/ml; closed bar). One-way ANOVA was used in B and C. And the bar graphs are mean  $\pm$  s.e.m. The data are means of three independent experiments. \*P < 0.05.
